# Supplementary material for: Multi-level meta-analysis of whether fostering creativity during physical activity interventions increases their impact on cognitive and academic outcomes during childhood
Source: PubMed Central journal article supplement (PMC10209177; doi:10.1038/s41598-023-35082-y), 2023-05-24
Supplement: 41598_2023_35082_MOESM1_ESM.pdf [file 41598_2023_35082_MOESM1_ESM.pdf]

**Multi-level meta-analysis of whether fostering creativity during physical activity interventions increases their impact on cognitive and academic outcomes during childhood**

Fotini Vasilopoulos<sup>1,2</sup>, Holly Jeffrey<sup>3</sup>, Yanwen Wu<sup>3</sup>, & Iroise Dumontheil<sup>1,2</sup>

<sup>1</sup> Centre for Brain and Cognitive Development, Department of Psychological Sciences,  
Birkbeck, University of London, London, UK

<sup>2</sup> Centre for Educational Neuroscience, University of London, London, UK

<sup>3</sup> University of Cambridge, Cambridge, UK

Corresponding author:

Fotini Vasilopoulos

Department of Psychological Sciences

Birkbeck, University of London

Malet Street, WC1E 7HX, London, UK

fvasil01@mail.bbk.ac.uk

**Table S1.**

|                             | <b>Lower creativity</b>                        | <b>Higher creativity</b>           | <b>0</b>                                                                                               | <b>1</b>              | <b>2</b>                                                                                                                                                 |
|-----------------------------|------------------------------------------------|------------------------------------|--------------------------------------------------------------------------------------------------------|-----------------------|----------------------------------------------------------------------------------------------------------------------------------------------------------|
| <b>TASK CHARACTERISTICS</b> | Repetitive                                     | Varied                             | Block training such as learning a set move in ballet or forehand swing in tennis until it is mastered. | A mixture of the two. | A variety of activities to learn. Using different tennis games with different rules to master a forehand.                                                |
|                             | 1. Individual<br>2. Parallel<br>3. No opponent | 1. Group<br>2. Team<br>3. Opponent | Practicing individually with no interaction with others such as an aerobics class.                     | A mixture of the two. | Interaction with someone whether that be competitively or not.                                                                                           |
|                             | Technical acquisition                          | Real world activity                | Drills to master motor skills.                                                                         | A mixture of the two. | A sport or holistic movement activity practiced as it is e.g. tennis or martial arts.                                                                    |
|                             | Convergent task                                | Divergent task                     | Does not allow for exploration and is prescriptive. For example, copying in ballet.                    | A mixture of the two. | Allows for exploration such as PA games or creative movement.                                                                                            |
| <b>ENVIRONMENT</b>          | Technical instruction and demonstration        | Open-ended instruction             | Copying the teacher's movements. For example, in a dance choreography or aerobics class.               | A mixture of the two. | Open-ended instructions include " <i>Show me any kind of...</i> ", " <i>Show me any other way to...</i> ", " <i>How would you do that differently?</i> " |
|                             | Fixed space                                    | Open space                         | Court, swim lanes or track.                                                                            | A mixture of the two. | An indoor or outdoor space with changing boundaries or no boundaries.                                                                                    |
|                             | No props                                       | Props                              | Use of just the body. For example, aerobics class such as cross fit.                                   | A mixture of the two  | Music in dance or balls in sports.                                                                                                                       |

**Table S2.** Search Terms

| Intervention        | Population | Setting | Design       | Outcomes           |
|---------------------|------------|---------|--------------|--------------------|
| danc*               | child*     | class*  | train*       | acad*              |
| gymnas*             | NOT ADHD   | school  | practice     | achiev*            |
| physical* active    | NOT autis* |         | curriculum   | attain*            |
| activity            | NOT obes*  |         | intervention | math*              |
| PE                  |            |         | teach*       | numeracy           |
| sport               |            |         | instruct*    | literacy           |
| fitness             |            |         | class        | reading            |
| exercis*            |            |         | trial        | cognit*            |
| creativity creative |            |         |              | executive function |
| theat*              |            |         |              | attention*         |
|                     |            |         |              | inhibit*           |
|                     |            |         |              | flexibility        |
|                     |            |         |              | switch*            |
|                     |            |         |              | shift*             |
|                     |            |         |              | plan*              |
|                     |            |         |              | working memory     |
|                     |            |         |              | updating           |

**Table S3.** Eligibility Criteria

|              | Inclusion Criteria                                                                                                                                                                                                                                                       | Exclusion Criteria                                                                                                                                                                            |
|--------------|--------------------------------------------------------------------------------------------------------------------------------------------------------------------------------------------------------------------------------------------------------------------------|-----------------------------------------------------------------------------------------------------------------------------------------------------------------------------------------------|
| Population   | Participants aged between 5 and 12 years old                                                                                                                                                                                                                             | Participants with a developmental delay, developmental disorder, obesity, physical or mental illness                                                                                          |
| Intervention | Physical activities (PA), defined as any activity that encourages children to move<br><br>PA programs that were manipulated within the study and included a minimum of three sessions over the course of more than one week.                                             | Single bouts of PA<br><br>PA that is considered elite training<br><br>An activity that is creative but does not include PA (e.g. painting, drawing, music)                                    |
| Comparison   | Active or passive control group                                                                                                                                                                                                                                          | No comparison group                                                                                                                                                                           |
| Outcomes     | Direct assessment using objective or standardised measures of cognitive outcomes (working memory, inhibitory control, cognitive flexibility, planning, attention, fluid intelligence, creativity or on-task behaviour) or academic achievement (mathematics or language) | Subjective measures such as surveys, questionnaires, or interviews that are self-report or completed by teachers or parents<br><br>Objective measures of other aspects of cognition (e.g. IQ) |
| Study Design | Randomised controlled trials (RCTs), pilot-, cluster-, or quasi-RCTs, controlled before and after studies                                                                                                                                                                | Observational studies (e.g., cross-sectional, cohort, case-control), quasi-experimental studies, non-randomised control trials, or case studies                                               |
| Publication  | Peer-reviewed<br>Written in English                                                                                                                                                                                                                                      | Reviews, editorials, policy reviews, statements, or commentaries                                                                                                                              |

**Table S4.** Study Characteristics

| Study                       | n    | M age | % Female | Physical activity intervention                                                | Duration (weeks) | Freq. (per week) | Intensity   | Session duration (min) | Teacher qualification                | Control group(s)                                    | Quality  | Outcomes                                      | Instrument                                                                                                                     |
|-----------------------------|------|-------|----------|-------------------------------------------------------------------------------|------------------|------------------|-------------|------------------------|--------------------------------------|-----------------------------------------------------|----------|-----------------------------------------------|--------------------------------------------------------------------------------------------------------------------------------|
| Aadland et al. 2019         | 1202 | 10.2  | -        | Active Smarter Kids (PA with academic instruction)                            | 20               | 3                | MVPA        | 30                     | Classroom teacher (LQ)               | PE                                                  | Strong   | Language Maths                                | Standardised national test                                                                                                     |
| Ahamed et al. 2007          | 287  | 10.2  | 50.2%    | AS! BC (PA break from academic instruction)                                   | 50               | 5                | MPA         | 15                     | Classroom teacher (LQ)               | PE                                                  |          | AA composite                                  | Canadian Achievement Test (CAT-3)                                                                                              |
| Barnard et al. 2014         | 149  | 7.4   | 53.0%    | Integrated PA (PA with academic instruction)                                  | 8                | 3                | LPA         | 30                     | Not reported (LQ)                    | 1. Intensive PA 2. Passive                          | Weak     | Language Maths                                | ESSI Reading<br>ESSI Spelling<br>Vassi Mathematical Skills                                                                     |
| Beck et al. 2016            | 165  | 7.5   | 46.7%    | Gross Motor Math (PA with academic instruction)                               | 6                | 3                | LMPA        | 60                     | Classroom teacher (LQ)               | 1. Fine Motor Math (not PA) 2. Academic Instruction |          | Inhibitory control<br>Maths<br>Working memory | Eriksen Flanker Task<br>Standardised test<br>CANTAB: Spatial Span subset                                                       |
| Beckmann et al. 2022        | 481  | 8.1   | 49.0%    | KazKidz                                                                       | 12               | 2                | Cannot tell |                        | HQ                                   | Placebo                                             | Strong   | Inhibitory control<br>Language Maths          | Eriksen Flanker Task<br>School Performance Test                                                                                |
| Bugge et al. 2018           | 1181 | 8.4   | 53.3%    | PE Boost                                                                      | 234              | 4                | cannot tell | 45                     | PE teachers (HQ)                     | PE                                                  |          | Language Maths                                | Danish National Test System                                                                                                    |
| Bunketorp et al. 2015       | 545  | -     | 46.4%    | School-in-Motion: different sports and games with or without use of equipment | 8                | 2                | MVPA        | 30                     | Experienced exercise instructor (HQ) | PE                                                  | Moderate | Language Maths                                | Standardised national test                                                                                                     |
| Cecchini & Carriedo 2020    | 46   | 6.4   | 58.7%    | math-PE integrated teaching                                                   | 3                | 5                | MVPA        | 60                     | PE teachers (HQ)                     | PE                                                  |          | Maths                                         | Standardised test                                                                                                              |
| Chaddock-Heyman et al. 2013 | 23   | 8.9   | 56.5%    | Fitness Improves Thinking in Kids (FIT Kids) (Aerobic)                        | 30               | 5                | MVPA        | 120                    | University staff (HQ)                | Passive                                             | Weak     | Inhibitory control                            | Eriksen Flanker Task                                                                                                           |
| Chaddock-Heyman et al. 2020 | 150  | 8.5   | 54.3%    | Fitness Improves Thinking in Kids (FIT Kids) (Aerobic)                        | 30               | 5                | MVPA        | 120                    | University staff (HQ)                | Passive                                             |          | Fluid intelligence<br>Language Maths          | Kaufman Test of Educational Achievement<br>WJ III: Concept Formation, Planning, Verbal Comprehension, Visual Auditory Learning |

| Study                    | n   | Age  | % Female    | Physical activity intervention                         | Duration (weeks) | Freq. (per week) | Intensity   | Session duration (min) | Teacher qualification          | Control group(s)                                                        | Quality            | Outcomes                                                                                        | Instrument                                                                                                                                                                                                                                       |
|--------------------------|-----|------|-------------|--------------------------------------------------------|------------------|------------------|-------------|------------------------|--------------------------------|-------------------------------------------------------------------------|--------------------|-------------------------------------------------------------------------------------------------|--------------------------------------------------------------------------------------------------------------------------------------------------------------------------------------------------------------------------------------------------|
| Chaya et al. 2012        | 193 | 7.7  | 49.7%       | Yoga                                                   | 12               | 6                | LPA         | 45                     | Experienced yoga teacher (HQ)  | PA - passive stretching and aerobic exercises (running and group games) | Strong             | Fluid intelligence<br>Language<br>Maths                                                         | Malinas Intelligence Scale for Indian Children (MISIC). Indian adaptation of the WISC-II.                                                                                                                                                        |
| Cichy et al. 2020        | 47  | 7    | 44.7%       | PE with Eduball                                        | 39               | 2                | cannot tell | 45                     | Classroom teacher (LQ)         | PE                                                                      | Moderate           | Maths                                                                                           | Standardised national test                                                                                                                                                                                                                       |
| Coe et al. 2006          | 214 | 11.5 | 49.0%       | PE                                                     | 20               | 5                | cannot tell | 55                     | Not reported (LQ)              | Alternative exploratory class (i.e., arts and computer classes)         | Weak               | AA composite                                                                                    | Standardised national test                                                                                                                                                                                                                       |
| Condello et al. 2021     | 181 | 10.7 | 50.0%       | Games-based Multisport                                 |                  | 1                | Cannot tell |                        | HQ                             | PE                                                                      | Moderate           | Inhibitory control<br>Working memory                                                            | Random Number Generation Task                                                                                                                                                                                                                    |
| Crova et al. 2014        | 70  | 9.6  | 50.0%       | Tennis skill-based training                            | 21               | 1                | MVPA        | 120                    | PE teachers (HQ)               | PE                                                                      | Weak               | Inhibitory control<br>Working memory                                                            | Random Number Generation Task                                                                                                                                                                                                                    |
| D'Souza & Wiseheart 2018 | 75  | 7.8  | 58.7%       | Dance: Creative Movement                               | 3                | 5                | MPA         | 120                    | Experienced dance teacher (HQ) | 1. Music<br>2. Passive                                                  |                    | Cognitive flexibility<br>Fluid intelligence<br>Inhibitory control<br>Language<br>Working memory | Color-shape switch task<br>Digit Span Backward<br>Eriksen Flanker Task<br>K-BIT (Kaufman brief Intelligence Test) matrices<br>PPVT (Peabody Picture Vocabulary Test)<br>Quantity Identity Task<br>Self Ordering Point Task<br>Stroop Colour Test |
| Dalziell et al. 2015     | 46  | 9.5  | 52.2%       | Better Movers and Thinkers (BMT) Enriched PA programme | 16               | 2                | cannot tell | 60                     | PE teachers (HQ)               | PE                                                                      | Strong             | Fluid intelligence<br>Language<br>Working memory                                                | The Lucid Assessment System for Schools: phonological composite, reading composite, reasoning, spelling, visual spatial memory subtest.                                                                                                          |
| Dalziell et al. 2019     | 150 | 10.5 | cannot tell | Better Movers and Thinkers (BMT)                       | 16               | 2                | cannot tell | 60                     | PE teachers (HQ)               | PE                                                                      | Moderate<br>Strong | EF composite                                                                                    | Cognitive Assessment System                                                                                                                                                                                                                      |

| Study                | n   | Age       | % Female    | Physical activity intervention                                                                     | Duration (weeks) | Freq. (per week) | Intensity | Session duration (min) | Teacher qualification                       | Control group(s)                                               | Quality  | Outcomes                                                                        | Instrument                                                                                                                                                       |
|----------------------|-----|-----------|-------------|----------------------------------------------------------------------------------------------------|------------------|------------------|-----------|------------------------|---------------------------------------------|----------------------------------------------------------------|----------|---------------------------------------------------------------------------------|------------------------------------------------------------------------------------------------------------------------------------------------------------------|
|                      |     |           |             | Enriched PA programme                                                                              |                  |                  |           |                        |                                             |                                                                |          |                                                                                 |                                                                                                                                                                  |
| DeBruijn et al. 2020 | 891 | 9.2       | 51.2%       | Aerobic intervention                                                                               | 14               | 4                | MVPA      | 30                     | PE teachers (HQ)                            | 1. Cognitively engaging activity                               | Strong   | Language Maths                                                                  | Standardised tests                                                                                                                                               |
| DeGreeff et al. 2016 | 499 | 8.1       | 54.7%       | F&V (PA with academic instruction)                                                                 | 44               | 3                | MVPA      | 20                     | Classroom teacher (LQ)                      | 2. PE Passive                                                  |          | Cognitive flexibility<br>Inhibitory control<br>Working memory                   | Digit Span Backward<br>Stroop Colour Test<br>Visual Span Backward<br>Wisconsin Card Sorting Test                                                                 |
| Donnelly et al. 2017 | 584 | 8.1       | 51.4%       | Physical Activity Across the Curriculum (PAAC)                                                     | 117              | 10               | MVPA      | 10                     | Classroom teacher (LQ)                      | Passive                                                        | Strong   | Language Maths                                                                  | Wechsler Individual Achievement Test-Third Edition                                                                                                               |
| Egger et al. 2019    | 142 | 7.9       | 54.9%       | PA breaks (high cognitive engagement, high physical exertion) (PA break from academic instruction) | 20               | 10               | MVPA      | 10                     | Classroom teacher (LQ)                      | 1. Aerobic group<br>2. Cognitive group (low physical exertion) |          | cognitive flexibility<br>Inhibitory control<br>Language Maths<br>Working memory | Backwards Colour Recall task<br>Eriksen Flanker Task<br>Hamburger Schreib-Probe: Spelling<br>Heidelberger Rechentest: Maths<br>Salzburger Lesescreening: Reading |
| Fedewa & Davis, 2015 | 460 | grade 3-5 | cannot tell | Classroom-based physical activity breaks                                                           | 25               | 20               | MPA       | 5                      | Classroom teacher (LQ)                      | Passive                                                        | Strong   | Fluid intelligence<br>Language Maths                                            | Standard Progressive Matrices<br>National standardised tests                                                                                                     |
| Fedewa et al. 2018   | 460 | grade 3-5 | 51.0%       | Academic-based movement breaks                                                                     | 36               | 10               | LPA       | 10                     | Video (HQ)                                  | Aerobic-only movement breaks                                   |          | PE                                                                              | Language Maths                                                                                                                                                   |
| Fisher et al. 2011   | 64  | 6.1       | 55.0%       | Aerobic PE curriculum                                                                              | 10               | 2                | MVPA      | 60                     | Researchers, PE and Classroom teachers (HQ) |                                                                | Moderate | Attention<br>Fluid intelligence<br>Planning<br>Working memory                   | CANTAB: attention and working memory subset<br>CAS: planning and simultaneous scale subset                                                                       |
| Frischen et al. 2019 | 76  | 5.7       | 60.1%       | Yoga                                                                                               | 20               | 3                | LPA       | 20                     | Researchers (HQ)                            | 1. Rhythm training<br>2. Pitch training                        |          | Cognitive flexibility<br>Inhibitory control<br>Working memory                   | Corsi Block Test<br>Dimensional Change Card Sort<br>Matrix Span Test<br>NEPSY-II "statue" subtest                                                                |
|                      |     |           |             |                                                                                                    |                  |                  |           |                        |                                             |                                                                | Moderate |                                                                                 |                                                                                                                                                                  |

| Study                        | n   | Mean age | % Female    | Physical activity intervention                         | Duration (weeks) | Freq. (per week) | Intensity   | Session duration (min) | Teacher qualification                  | Control group(s)                                    | Quality  | Outcomes                                      | Instrument                                                      |
|------------------------------|-----|----------|-------------|--------------------------------------------------------|------------------|------------------|-------------|------------------------|----------------------------------------|-----------------------------------------------------|----------|-----------------------------------------------|-----------------------------------------------------------------|
| Fernandes et al. 2022        | 47  | 10.5     | 50.0%       | Capoeira                                               |                  | 3                | Cannot tell | 60                     | HQ                                     | Passive                                             |          | Working memory<br>Inhibitory control<br>Maths | WISC IV Digit span backward<br>WISC IV Letter number sequencing |
| Gall et al. 2018             | 663 | 9.2      | 51.0%       | Moving to Music                                        | 20               | 1                | MPA         | 45                     | Classroom teacher and Researchers (HQ) | PE                                                  | Strong   | Language<br>Attention<br>AA composite         | d2 Test of Attention<br>End of year results                     |
| Gallotta et al. 2015         | 230 | 9.5      | cannot tell | Coordinative PA                                        | 20               | 2                | MVPA        | 60                     | Classroom teacher (LQ)                 | 1. Traditional PA<br>2. Passive                     | Moderate | Attention                                     | d2 Test of Attention                                            |
| Garcia-a-Hermoso et al. 2020 | 170 | 10.1     | 43.5%       | Active Start (PE boost)                                | 8                | 5                | MVPA        | 30                     | Sport Science Graduate (LQ)            | PE                                                  | Strong   | Attention<br>Language<br>Maths                | d2 Test of Attention<br>End of year results                     |
| Giordano & Alesi 2022        | 75  | 5.7      | 48.0%       | Enriched programme                                     |                  | 3                | Cannot tell | 10                     | HQ                                     | Free play<br>Passive                                | Moderate | Inhibitory control                            | Stroop Test<br>Head Shoulders Knees Toes                        |
| Have et al. 2018             | 505 | 7.2      | 50.5%       | Active Math (PA with academic instruction)             | 30               | 6                | MVPA        | 45                     | Classroom teacher (LQ)                 | Academic instruction                                | Moderate | Inhibitory control<br>Maths                   | Eriksen Flanker Task<br>Standardised test                       |
| Hillman et al. 2014          | 221 | 8.8      | 46.2%       | Fitness Improves Thinking in Kids (FIT Kids) (Aerobic) | 30               | 5                | MVPA        | 120                    | University staff (HQ)                  | Passive                                             | Strong   | Cognitive flexibility<br>Inhibitory control   | Color-shape switch task<br>Eriksen Flanker Task                 |
| Hraste et al. 2018           | 36  | 10.4     | cannot tell | Integrated lessons of mathematics/geometry and PA      | 4                | 4                | LMPA        | 45                     | Classroom teacher (LQ)                 | Academic instruction                                | Moderate | AA composite                                  | National standardised test                                      |
| Hsieh et al. 2017            | 44  | 8.6      | 47.7%       | Gymnastics                                             | 8                | 2                | MPA         | 90                     | PE teachers (HQ)                       | Passive                                             | Weak     | Working memory                                | Delayed matching-to-sample test                                 |
| Jia et al. 2021              | 40  | 6.1      | 50.0%       | Diverse exercise                                       |                  | 3                | MPA         |                        | HQ                                     | Aerobic                                             | Moderate | Language<br>Maths                             | Wechsler Individual Achievement Test-Third Edition              |
| Kamijo et al. 2011           | 36  | 9.0      | 52.8%       | After-School PA Intervention (aerobic)                 | 30               | 5                | MVPA        | 120                    | University staff (HQ)                  | Passive                                             | Moderate | Working memory                                | Sternberg task                                                  |
| Koutsandreou et al. 2015     | 71  | 9.4      | 54.9%       | Cardiovascular Fitness Training                        | 10               | 3                | MVPA        | 45                     | Experienced exercise instructor (HQ)   | 1. Motor skills training<br>2. Academic instruction | Strong   | Working memory                                | Letter Digit Span                                               |



| Study                 | n   | M age       | % Female | Physical activity intervention                                          | Duration (weeks) | Freq. (per week) | Intensity   | Session duration (min) | Teacher qualification                    | Control group(s)      | Quality  | Outcomes                                                              | Instrument                                                                                                                |
|-----------------------|-----|-------------|----------|-------------------------------------------------------------------------|------------------|------------------|-------------|------------------------|------------------------------------------|-----------------------|----------|-----------------------------------------------------------------------|---------------------------------------------------------------------------------------------------------------------------|
| Kvalo et al. 2017     | 449 | 9.5         | 48.7%    | Active School (PA with academic instruction)                            | 38               | 2                | MPA         | 45                     | Classroom teacher (LQ)                   | PE                    |          | Inhibitory control<br>Working memory                                  | Backward digit span task<br>Stroop Golden interference effect                                                             |
| Lakes & Hoyt 2004     | 193 | cannot tell | 51.3%    | Taekwondo                                                               | 12               | 2                | MVPA        | 45                     | Experienced martial arts instructor (HQ) | PE                    | Strong   | Maths<br>On-task behaviour<br>Working memory                          | Cognitive subscale of Response to Challenge Scale<br>WISC III-FD Arithmetic and Digit Span                                |
| Lakes et al. 2013     | 59  | 12.2        | 52.0%    | Taekwondo                                                               | 36               | 2                | VPA         | 45                     | Experienced martial arts instructor (HQ) | PE                    | Strong   | EF<br>composite<br>Inhibitory control                                 | The Hearts & Flowers test                                                                                                 |
| Leandro et al. 2018   | 117 | 7.5         | 43.6%    | Creative dance & mathematics (PA with academic instruction)             | 5                | 1                | MPA         | 60                     | Classroom teacher (LQ)                   | Academic instruction  | Moderate | Maths                                                                 | Standardised test                                                                                                         |
| Lin et al. 2021       | 50  | 8.6         | 48.0%    | Gymnastics                                                              | 8                | 2                | MPA         | 90                     | PE teachers (HQ)                         | Passive               | Strong   | Working memory                                                        | Spatial working memory delayed-matching test                                                                              |
| Lind et al. 2018      | 931 | 11.9        | 51.0%    | Football                                                                | 11               | 2                | MVPA        | 45                     | Classroom teacher (LQ)                   | PE                    | Strong   | Working memory                                                        | Cogstate® Brief Battery: one back (OBK)                                                                                   |
| Marson et al. 2021    | 30  | 8.5         | 30.0%    | Quadrato Motor Training (QMT)                                           |                  | 4                | Cannot tell |                        | HQ                                       | One Minute Meditation | Weak     | Creativity                                                            | Alternative Uses Test                                                                                                     |
| Mavilidi et al. 2018  | 55  | 10.3        | 47.3%    | Thinking While Moving in English (TWM-E) (PA with academic instruction) | 4                | 3                | MPA         | 40                     | Researchers, PE teacher (HQ)             | Passive               |          | Inhibitory control<br>Language<br>On-task behaviour<br>Working memory | Eriksen Flanker Task<br>Grammar and Punctuation test<br>Momentary time sampling n-back task<br>National standardised test |
| Mavilidi et al. 2020  | 283 | 9.8         | 48.4%    | Thinking While Moving in English (TWM-E) (PA with academic instruction) | 6                | 3                | MPA         | 40                     | Classroom teacher (LQ)                   | Passive               | Weak     | Language<br>On-task behaviour                                         | National standardised test<br>Momentary time sampling                                                                     |
| Mavilidi & Vazou 2021 | 560 | 10          | 51.0%    | Move for thought                                                        |                  | 3                | Cannot tell |                        | HQ                                       | Academic              | Strong   | Maths                                                                 | Academic Achievement Test                                                                                                 |
| Mazzoli et al. 2021   | 141 | 7.7         | 46.1%    | Cognitively engaging Active Breaks                                      |                  | 4                | Cannot tell |                        | HQ                                       | Academic instruction  | Moderate | Attention<br>Inhibitory control<br>Working memory                     | Go No/Go<br>List sorting working memory test (NIH Toolbox)                                                                |

| Study                         | n   | Age  | % Female    | Physical activity intervention                             | Duration (weeks) | Freq. (per week) | Intensity   | Session duration (min) | Teacher qualification          | Control group(s)                  | Quality  | Outcomes                                                      | Instrument                                                                                                   |
|-------------------------------|-----|------|-------------|------------------------------------------------------------|------------------|------------------|-------------|------------------------|--------------------------------|-----------------------------------|----------|---------------------------------------------------------------|--------------------------------------------------------------------------------------------------------------|
| McMahon et al. 2003           | 721 | 6.5  | cannot tell | Basic Reading Through Dance (PA with academic instruction) | 10               | 2                | MPA         | 40                     | Experienced dance teacher (HQ) | Passive                           | Strong   | Language                                                      | PhonoGraphix Standardised Tests                                                                              |
| Mead et al. 2016              | 81  | 11.5 | 51.9%       | Activity breaks from academic instruction                  | 40               | 5                | MVPA        | 10                     | Classroom teacher (LQ)         | 1. Stability Balls<br>2. Passive  |          | Maths                                                         | National standardised test<br>Measure of academic progress test                                              |
| Meijer et al. 2021            | 650 | 9.17 | 50.6%       | Cognitively engaging                                       | 14               | 4                | MVPA        |                        | HQ                             | Passive                           | Weak     | Attention Working memory<br>Inhibitory control                | Attention Network Task<br>WISC III-FD Digit span<br>Stop and Signal Task                                     |
| Meloni & Fanari 2019          | 85  | 9.3  | 51.8%       | Basketball                                                 | 30               | 1                | MVPA        | 60                     | Not reported (LQ)              | Chess                             |          | Language<br>Maths                                             | Standard Progressive Battery<br>Studying test                                                                |
| Morris et al. 2022            | 97  | 9.6  | 52.6%       | Maths on the move                                          |                  | 1                | MVPA        |                        | HQ                             | Academic                          | Moderate | Maths                                                         |                                                                                                              |
| Moreau et al. 2017            | 318 | 9.9  | 61.3%       | HIT (High Intensity Training)                              | 6                | 5                | VPA         | 10                     | Video (HQ)                     | Sedentary Games                   |          | Inhibitory control<br>Working memory                          | Backward digit span task<br>Stroop Test<br>Eriksen Flanker Task                                              |
| Mullender-Wijnsma et al. 2015 | 228 | 8.1  | 46.5%       | F&V (PA with academic instruction)                         | 21               | 3                | MVPA        | 10                     | Classroom teacher (LQ)         | Passive                           | Strong   | Language<br>Maths                                             | One-Minute Test - Reading<br>Speed Test Arithmetic                                                           |
| Mullender-Wijnsma et al. 2016 | 499 | 8.1  | 45.2%       | F&V (PA with academic instruction)                         | 44               | 3                | MVPA        | 20                     | Classroom teacher (LQ)         | Passive                           |          | Language<br>Maths                                             | One-Minute Test - Reading<br>Speed Test Arithmetic<br>Child Academic Monitoring System -<br>Maths & Spelling |
| Mullender-Wijnsma et al. 2019 | 499 | 8.1  | 54.7%       | F&V (PA with academic instruction)                         | 44               | 3                | MVPA        | 20                     | Classroom teacher (LQ)         | Passive                           | Strong   | Language<br>Maths                                             | One-Minute Test - Reading<br>Speed Test Arithmetic<br>Child Academic Monitoring System -<br>Maths & Spelling |
| Nobre et al. 2022             | 211 |      | 50.0%       | Mastery climate                                            |                  | 3                | Cannot tell |                        | HQ                             | Traditional PA                    |          | Maths<br>Language                                             |                                                                                                              |
| Neville & Makopoulou 2021     | 40  | 7.4  | 50.0%       | Dance-based PE                                             | 6                | 1                | MPA         | 50                     | PE Graduate (LQ)               | PE                                | Moderate | Creativity                                                    | Guilford's (1967) Alternative Uses task                                                                      |
| Norris et al. 2018            | 219 | 8.6  | 49.3%       | Virtual Traveller                                          | 6                | 3                | MVPA        | 10                     | Classroom teacher (LQ)         | Passive                           |          | On-task behaviour                                             | Observing Teachers and Pupils in Classrooms (OPTIC) tool                                                     |
| Oppici et al. 2020            | 80  | 8.8  | 61.0%       | Dance (high cognitive)                                     | 7                | 2                | MPA         | 60                     | Experienced dance teacher (HQ) | 1. Dance (low cognitive)<br>2. PE | Strong   | Cognitive flexibility<br>Inhibitory control<br>Working memory | Dimensional Change Card Sort<br>Eriksen Flanker Task<br>List sorting working memory test (NIH Toolbox)       |

| Study                     | n    | Age  | % Female    | Physical activity intervention                                          | Duration (weeks) | Freq. (per week) | Intensity   | Session duration (min) | Teacher qualification                   | Control group(s)              | Quality  | Outcomes                                                | Instrument                                                                                       |
|---------------------------|------|------|-------------|-------------------------------------------------------------------------|------------------|------------------|-------------|------------------------|-----------------------------------------|-------------------------------|----------|---------------------------------------------------------|--------------------------------------------------------------------------------------------------|
| Pesce et al. 2013         | 250  | 6.9  | 49.2%       | Cognitively Enriched Specialist Led PA                                  | 20               | 1                | Cannot tell | 60                     | PE teachers (HQ)                        | 1. Specialist Led PE          | Strong   | Attention Planning                                      | CAS: attention and planning sub-scale                                                            |
| Pesce et al. 2016         | 460  | 7.5  | 50.0%       | Enriched PE (high cognitive)                                            | 24               | 1                | Cannot tell | 60                     | PE teachers (HQ)                        | 2. PE PE                      |          | Attention Inhibitory control Working memory             | CAS: attention sub-scale Random Number Generation Task                                           |
| Pesce et al. 2021         | 116  | 8.8  | 53.0%       | Self control programme                                                  |                  | 1                | Cannot tell |                        | PE teachers (HQ)                        | PE                            | Moderate | Inhibitory control                                      |                                                                                                  |
| Reed et al. 2010          | 155  | 10   | 43.2%       | PA fundamental skills in Core Curriculum (PA with academic instruction) | 12               | 3                | MPA         | 30                     | Researchers and Classroom teachers (HQ) | Academic instruction          | Moderate | Attention Fluid intelligence                            | Standard Progressive Matrices                                                                    |
| Resaland et al. 2016      | 1202 | 10.2 | cannot tell | Active Smarter Kids (PA with academic instruction)                      | 28               | 3                | MVPA        | 30                     | Classroom teacher (LQ)                  | PE                            | Strong   | Language Maths                                          | National standardised tests                                                                      |
| Richard et al. 2018       | 173  | 9.6  | cannot tell | Creative Exercise Program                                               | 10               | 1                | MPA         | 30                     | PE teachers (HQ)                        | Conventional Exercise Program |          | Creativity                                              | Bertsch test motor creativity Runco Creative Assessment Battery                                  |
| Riley et al. 2015         | 54   | 10.5 | 48.2%       | EASY Minds (PA with academic instruction)                               | 6                | 3                | MVPA        | 60                     | Classroom teacher (LQ)                  | Academic instruction          | Strong   | On-task behaviour                                       | Momentary time sampling                                                                          |
| Riley et al. 2016         | 240  | 11.1 | 40.7%       | EASY Minds (PA with academic instruction)                               | 6                | 3                | MPA         | 60                     | Classroom teacher (LQ)                  | Passive                       |          | Maths On-task behaviour                                 | Momentary time sampling Standardised test                                                        |
| Rudd et al. 2021          | 55   | 6.6  | 47.0%       | Creative dance                                                          | 10               | 2                | Cannot tell | 60                     | HQ                                      | Choreography dance            | Strong   | Cognitive flexibility Inhibitory control Working memory | Dimensional Change Card Sort Eriksen Flanker Task List sorting working memory test (NIH Toolbox) |
| Sanchez-Lopez et al. 2019 | 1608 | 5.8  | 56.3%       | MOVI-KIDS (recreational non-competitive physical activity)              | 26               | 3                | MVPA        | 60                     | Experienced exercise instructor (HQ)    | PE                            |          | Fluid intelligence Maths                                | Battery of general and Differential Aptitudes - logic reasoning and numerical factor subsets     |
| Santos et al. 2017        | 50   | 9.2  | cannot tell | Skills4Genius                                                           | 20               | 3                | MVPA        | 60                     | PE teachers (HQ)                        | PE (Additional)               | Moderate | Creativity                                              | Creativity Behavior Assessment in Team Sports Torrance Test of Creative Thinking                 |
| Schmidt et al. 2015       | 181  | 11.4 | 54.9%       | Team Games                                                              | 6                | 2                | MVPA        | 45                     | PE teachers (HQ)                        | 1. Aerobic Exercise           | Moderate | Cognitive flexibility                                   | Eriksen Flanker task n-back task with pictures of fruits                                         |

| Study                        | n   | Age  | % Female | Physical activity intervention                  | Duration (weeks) | Freq. (per week) | Intensity   | Session duration (min) | Teacher qualification                | Control group(s)     | Quality  | Outcomes                                                      | Instrument                                                                                                                                                           |
|------------------------------|-----|------|----------|-------------------------------------------------|------------------|------------------|-------------|------------------------|--------------------------------------|----------------------|----------|---------------------------------------------------------------|----------------------------------------------------------------------------------------------------------------------------------------------------------------------|
| Sjowall 2017                 | 470 | 9.5  | 48.5%    | PE Boost                                        | 78               | 5                | VPA         | 60                     | Activity leader (LQ)                 | PE                   |          | Inhibitory control<br>Working memory<br>Maths                 | Arithmetic test<br>Follow instructions task<br>Odd One Out task                                                                                                      |
| Tanir & Erkut 2018           | 56  | 9.2  | 50.0%    | Rhythmic Basketball                             | 6                | 2                | MVPA        | 60                     | PE teachers (HQ)                     | Basketball           | Weak     | Working memory<br>Inhibitory control                          | Stroop Colour Test                                                                                                                                                   |
| Telford et al. 2012          | 620 | 7.5  | 48.8%    | Specialist Taught PA                            | 75               | 2                | MVPA        | 45                     | PE teachers (HQ)                     | PE                   | Weak     | Language Maths                                                | National standardised tests                                                                                                                                          |
| Telles et al. 2013           | 98  | 10.5 | 38.7%    | Yoga                                            | 12               | 5                | LPA         | 45                     | Experienced yoga teacher (HQ)        | PA (Additional)      | Moderate | Inhibitory control                                            | Stroop Colour Test                                                                                                                                                   |
| Tocci et al. 2022            | 95  | 7.7  | 50.0%    | Specialist led enriched programme               |                  | 1                | Cannot tell |                        | Specialist teacher (HQ)              |                      | Strong   | Creativity<br>Inhibitory control<br>Working memory            | Bertsch test motor creativity<br>Random Number Generation Task                                                                                                       |
| Tottori 2019                 | 58  | 10.2 | 42.3%    | HIT (High Intensity Training)                   | 4                | 3                | MVPA        | 10                     | University staff (HQ)                | Passive              | Moderate | Planning<br>Working memory                                    | Digit Span Backward (WISC)<br>Tower of Hanoi (5 disk) time                                                                                                           |
| Tseng et al. 2021            | 55  | 11.3 | 51.0%    | FIFA11                                          |                  | 5                | Cannot tell |                        | HQ                                   | Passive              | Moderate | Attention                                                     | Attention Scale                                                                                                                                                      |
| Van den Berg et al. 2019     | 512 | 10.9 | 46.5%    | Just Dance                                      | 9                | 5                | MVPA        | 10                     | Video (HQ)                           | Academic instruction | Strong   | Attention<br>Inhibitory control                               | Attention Network<br>d2 Test of Attention<br>Stroop Colour test                                                                                                      |
| Van den Berg et al. 2019b    | 323 | 11   | 48.0%    | Juggling with Maths                             | 5                | 4                | LPA         | 5                      | Video (HQ)                           | Academic instruction | Strong   | Maths                                                         | Multiplication tables test                                                                                                                                           |
| Van der Niet et al. 2016     | 112 | 8.8  | 50.0%    | PA Boost (aerobic and cognitive enriched)       | 22               | 2                | MVPA        | 30                     | PE teachers (HQ)                     | Passive              | Strong   | Cognitive flexibility<br>Inhibitory control<br>Working memory | Digit Span Test from Weschler Memory Scale<br>Golden Stroop Colour Test<br>Tower of London<br>Trail-Making Test<br>Visual Memory Span test from Wechler Memory Scale |
| Van Klaveren & De Witte 2015 | 178 | 10.5 | 36.0%    | Football                                        | 10               | 1                | MVPA        | 180                    | Experienced exercise instructor (HQ) | Passive              | Moderate | Language Maths                                                | Test construction by CITO<br>National standardised test                                                                                                              |
| Vazou & Skrade 2017          | 284 | 10.0 | 46.5%    | Move for Thought (PA with academic instruction) | 8                | 3                | MPA         | 10                     | Classroom teacher (LQ)               | Academic instruction | Moderate | Maths                                                         | National standardised test                                                                                                                                           |

| Study                    | n   | Age  | % Female | Physical activity intervention                                                                    | Duration (weeks) | Freq. (per week) | Intensity | Session duration (min) | Teacher qualification  | Control group(s)     | Quality | Outcomes                                                      | Instrument                                                                                                                                              |
|--------------------------|-----|------|----------|---------------------------------------------------------------------------------------------------|------------------|------------------|-----------|------------------------|------------------------|----------------------|---------|---------------------------------------------------------------|---------------------------------------------------------------------------------------------------------------------------------------------------------|
| Vetter et al. 2020       | 170 | 8.4  | 52.0%    | Playground                                                                                        | 6                | 3                | MVPA      | 30                     | Classroom teacher (LQ) | Academic instruction | Strong  | Maths                                                         | NAPLAN test<br>Teacher-designed multiplication-tables test                                                                                              |
| Watson et al. 2019       | 341 | 9.1  | 52.8%    | ACTI-BREAK: a variety of elements including: drama, games, following instructions, and technology | 6                | 15               | MPA       | 5                      | Classroom teacher (LQ) | Academic instruction |         | Language<br>Maths<br>On-task behaviour                        | Wheldall Assessment of Reading<br>Passages Test<br>Westwood One Minute Tests of Basic Number Facts<br>Adaptation from the Direct Behaviour Rating Scale |
| Zinelabidine et al. 2022 | 44  | 10.3 | 49.0%    | Aerobic dance                                                                                     |                  | 2                | MVPA      |                        | HQ                     | Passive              | Strong  | Cognitive flexibility<br>Inhibitory control<br>Working memory | Trail-making test<br>Stroop Test<br>Digit Recall Test                                                                                                   |

**Table S5.** Results of analyses comparing higher and lower creativity physical intervention groups' effect on executive function measures

| Outcome measure            | Creativity rating group | Sample size | <i>k</i>  | ES        | Creativity grouping          |                      |                              |                                | Heterogeneity                    |                                  |               |          |
|----------------------------|-------------------------|-------------|-----------|-----------|------------------------------|----------------------|------------------------------|--------------------------------|----------------------------------|----------------------------------|---------------|----------|
|                            |                         |             |           |           | Summary effect size <i>g</i> | 95% CI               | <i>p</i> <sub>subgroup</sub> | <i>p</i> <sub>comparison</sub> | <i>I</i> <sup>2</sup><br>level 3 | <i>I</i> <sup>2</sup><br>level 2 | 95% CI        | <i>Q</i> |
| Executive function         |                         | 8448        | 45        | 127       |                              |                      |                              | 0.19                           | 25.7%                            | 47.1%                            | 67.0% - 72.8% | 320.7    |
|                            | Lower                   | 5660        | 29        | 88        | 0.08                         | -0.02 – 0.19         | 0.12                         |                                |                                  |                                  |               |          |
|                            | Higher                  | 2788        | 16        | 39        | 0.12                         | -0.25 – 0.49         | 0.53                         |                                |                                  |                                  |               |          |
| <i>Infl. cases removed</i> |                         | 7886        | 45        | 125       |                              |                      |                              | 0.97                           | 81.6%                            | 10.6%                            | 57.2% - 92.2% | 775.5    |
|                            | Lower <sup>1</sup>      | 5250        | 29        | 87        | 0.08                         | -0.02 – 0.19         | 0.11                         |                                |                                  |                                  |               |          |
|                            | Higher <sup>2</sup>     | 2636        | 16        | 38        | 0.05                         | -0.31 – 0.41         | 0.78                         |                                |                                  |                                  |               |          |
| Attention                  |                         | 2999        | 11        | 19        |                              |                      |                              | <b>&lt;0.01</b>                | 89.7%                            | 1.9%                             | 77.0% - 91.6% | 73.0     |
|                            | Lower                   | 2212        | 7         | 13        | 0.03                         | -0.03 – 0.10         | 0.28                         |                                |                                  |                                  |               |          |
|                            | Higher                  | 787         | 4         | 6         | 0.25                         | -0.36 – 0.86         | 0.34                         |                                |                                  |                                  |               |          |
| <i>Infl. cases removed</i> |                         | 2847        | 10        | 18        |                              |                      |                              | 0.30                           | 0.0%                             | 18.6%                            | 0.0% - 18.6%  | 20.1     |
|                            | Lower                   | 2212        | 7         | 13        | 0.03                         | -0.03 – 0.10         | 0.28                         |                                |                                  |                                  |               |          |
|                            | Higher <sup>2</sup>     | 635         | 3         | 5         | 0.01                         | -0.30 – 0.31         | 0.10                         |                                |                                  |                                  |               |          |
| Cognitive flexibility      |                         | 1278        | 11        | 16        |                              |                      |                              | <b>0.03</b>                    | 38.9%                            | 0.0%                             | 0.0% - 38.9%  | 22.4     |
|                            | Lower                   | 1173        | 8         | 10        | 0.13                         | -0.10 – 0.35         | 0.21                         |                                |                                  |                                  |               |          |
|                            | <b>Higher</b>           | <b>105</b>  | <b>3</b>  | <b>6</b>  | <b>-0.27</b>                 | <b>-0.54 – -0.01</b> | <b>0.04</b>                  |                                |                                  |                                  |               |          |
| <i>Infl. cases removed</i> |                         | 1057        | 10        | 15        |                              |                      |                              | <b>0.04</b>                    | 26.8%                            | 0.0%                             | 0.0% - 26.8%  | 5.3      |
|                            | Lower <sup>3</sup>      | 952         | 7         | 9         | 0.08                         | -0.14 – 0.31         | 0.42                         |                                |                                  |                                  |               |          |
|                            | <b>Higher</b>           | <b>105</b>  | <b>3</b>  | <b>6</b>  | <b>-0.27</b>                 | <b>-0.54 – -0.01</b> | <b>0.04</b>                  |                                |                                  |                                  |               |          |
| Inhibitory control         |                         | 5441        | 30        | 41        |                              |                      |                              | 0.66                           | 92.9%                            | 0.0%                             | 50.4% - 92.9% | 548.7    |
|                            | Lower                   | 3829        | 20        | 29        | -0.02                        | -0.16 – 0.11         | 0.71                         |                                |                                  |                                  |               |          |
|                            | Higher                  | 1612        | 10        | 12        | -0.12                        | -0.72 – 0.46         | 0.64                         |                                |                                  |                                  |               |          |
| <i>Infl. cases removed</i> |                         | 4981        | 29        | 40        |                              |                      |                              | 0.42                           | 92.0%                            | 0.0%                             | 11.9% - 92.0% | 386.8    |
|                            | Lower                   | 3829        | 20        | 29        | -0.02                        | -0.15 – 0.10         | 0.71                         |                                |                                  |                                  |               |          |
|                            | Higher <sup>4</sup>     | 1152        | 9         | 11        | -0.23                        | -0.85 – 0.39         | 0.43                         |                                |                                  |                                  |               |          |
| Working memory             |                         | 5287        | 30        | 46        |                              |                      |                              | 0.59                           | 0.1%                             | 78.9%                            | 60.7% - 79.6% | 145.4    |
|                            | <b>Lower</b>            | <b>3241</b> | <b>18</b> | <b>31</b> | <b>0.16</b>                  | <b>0.02 – 0.29</b>   | <b>0.02</b>                  |                                |                                  |                                  |               |          |
|                            | Higher                  | 2046        | 12        | 15        | 0.22                         | -0.01 – 0.44         | 0.05                         |                                |                                  |                                  |               |          |
| <i>Infl. cases removed</i> |                         | 5243        | 29        | 45        |                              |                      |                              | 0.98                           | 5.6%                             | 66.0%                            | 52.9% - 71.6% | 122.8    |
|                            | <b>Lower</b>            | <b>3241</b> | <b>18</b> | <b>31</b> | <b>0.16</b>                  | <b>0.02 – 0.29</b>   | <b>0.02</b>                  |                                |                                  |                                  |               |          |
|                            | Higher <sup>5</sup>     | 2002        | 11        | 14        | 0.13                         | -0.01 – 0.34         | 0.28                         |                                |                                  |                                  |               |          |

Note: significant associations are highlighted in bold, *k* = number of studies, *I*<sup>2</sup> at study level, ES = effect size. Removed as influential studies: <sup>1</sup> Kvalo et al., 2017; <sup>2</sup> Gallotta et al., 2015, one ES); <sup>3</sup> Hillman et al., 2014; <sup>4</sup> Pesce et al., 2016; <sup>5</sup> Hsieh et al., 2017.

**Table S6.** Results of analyses comparing higher and lower creativity physical intervention groups' effect academic achievement measures

| Outcome measure            | Creativity rating group | Sample size | <i>k</i> | ES  | Creativity grouping          |                    |                              |                                | Heterogeneity                 |                               |               |        |
|----------------------------|-------------------------|-------------|----------|-----|------------------------------|--------------------|------------------------------|--------------------------------|-------------------------------|-------------------------------|---------------|--------|
|                            |                         |             |          |     | Summary effect size <i>g</i> | 95% CI             | <i>p</i> <sub>subgroup</sub> | <i>p</i> <sub>comparison</sub> | <i>I</i> <sup>2</sup> level 3 | <i>I</i> <sup>2</sup> level 2 | 95% CI        | Q      |
| Academic achievement       |                         | 14386       | 47       | 114 |                              |                    |                              | 0.65                           | 78.4%                         | 18.6%                         | 74.0% - 97.0% | 1900.2 |
|                            | Lower                   | 8565        | 28       | 75  | <b>0.10</b>                  | <b>0.02 – 0.18</b> | <b>0.01</b>                  |                                |                               |                               |               |        |
|                            | Higher                  | 5821        | 19       | 39  | 0.20                         | -0.29 – 0.69       | 0.41                         |                                |                               |                               |               |        |
| <i>Infl. cases removed</i> |                         | 13641       | 46       | 113 |                              |                    |                              | 0.91                           | 78.2%                         | 18.8%                         | 64.3% - 97.0% | 1878.7 |
|                            | Lower                   | 8565        | 28       | 75  | <b>0.10</b>                  | <b>0.02 – 0.18</b> | <b>0.01</b>                  |                                |                               |                               |               |        |
|                            | Higher <sup>1</sup>     | 5076        | 18       | 38  | 0.15                         | -0.51 – 0.81       | 0.65                         |                                |                               |                               |               |        |
| Language                   |                         | 11320       | 32       | 60  |                              |                    |                              | 0.96                           | 56.9%                         | 40.8%                         | 73.0% - 97.7% | 1066.2 |
|                            | Lower                   | 6035        | 18       | 38  | 0.07                         | -0.04 – 0.17       | 0.20                         |                                |                               |                               |               |        |
|                            | Higher                  | 5285        | 14       | 22  | 0.10                         | -0.46 – 0.67       | 0.71                         |                                |                               |                               |               |        |
| <i>Infl. cases removed</i> |                         | 11162       | 31       | 59  |                              |                    |                              | 0.55                           | 57.2%                         | 40.4%                         | 62.1% - 97.7% | 1041.3 |
|                            | Lower                   | 6035        | 18       | 38  | 0.07                         | -0.04 – 0.17       | 0.20                         |                                |                               |                               |               |        |
|                            | Higher <sup>2</sup>     | 5127        | 13       | 21  | 0.04                         | -0.57 – 0.65       | 0.89                         |                                |                               |                               |               |        |
| Maths                      |                         | 13366       | 42       | 54  |                              |                    |                              | 0.48                           | 84.1%                         | 12.41%                        | 71.2% - 96.5% | 834.7  |
|                            | Lower                   | 7603        | 25       | 37  | <b>0.10</b>                  | <b>0.01 – 0.18</b> | <b>0.03</b>                  |                                |                               |                               |               |        |
|                            | Higher                  | 5733        | 17       | 17  | 0.25                         | -0.30 – 0.80       | 0.34                         |                                |                               |                               |               |        |
| <i>Infl. cases removed</i> |                         | 13264       | 42       | 53  |                              |                    |                              | 0.42                           | 0.0%                          | 96.7%                         | 64.3% - 96.7% | 825.8  |
|                            | Lower <sup>3</sup>      | 7531        | 25       | 36  | 0.08                         | -0.02 – 0.18       | 0.11                         |                                |                               |                               |               |        |
|                            | Higher                  | 5733        | 17       | 17  | 0.25                         | -0.30 – 0.80       | 0.34                         |                                |                               |                               |               |        |

Note: Significant associations are highlighted in bold, *k* = number of studies, *I*<sup>2</sup> at study level, ES = effect size. Removed as influential studies: <sup>1</sup> Leandro et al., 2018; <sup>2</sup> Garcia-a-Hermoso et al., 2020; <sup>3</sup> Mullender-Wijnsma et al., 2015, one effect size.

## References

- Aadland, K. N., Ommundsen, Y., Anderssen, S. A., Brønnick, K. S., Moe, V. F., Resaland, G. K., Skrede, T., Stavnsbo, M., & Aadland, E. (2019). Effects of the Active Smarter Kids (ASK) physical activity school-based intervention on executive functions: A cluster-randomized controlled trial. *Scandinavian Journal of Educational Research*, *63*(2), 214–228. <https://doi.org/10.1080/00313831.2017.1336477>
- Ahamed, Y., Macdonald, H., Reed, K., Naylor, P.-J., Liu-Ambrose, T., & McKay, H. (2007). School-based physical activity does not compromise children's academic performance. *Med Sci Sports Exerc*, *39*(2), 371–376. <https://doi.org/10.1249/01.mss.0000241654.45500.8e>
- Barnard, M., Van Deventer, K., & Oswald, M. (2014). The role of active teaching programmes in academic skills enhancement of grade 2 learners in the Stellenbosch region. *South African Journal for Research in Sport, Physical Education & Recreation*.  
<https://www.google.com/search?q=Barnard+M%2C+Van+Deventer+KJ%2C+Oswald+MM.+The+role+of+active+teaching+programmes+in+academic+skills+enhancement+of+grade+2+learners+in+the+Stellenbosch+region.+South+African+Journal+for+Research+in+Sport%2C+Physical+Educ>
- Beck, M. M., Lind, R. R., Geertsen, S. S., Ritz, C., Lundbye-Jensen, J., & Wienecke, J. (2016). Motor-enriched learning activities can improve mathematical performance in preadolescent children. *Frontiers in Human Neuroscience*, *10*. <https://doi.org/10.3389/fnhum.2016.00645>
- Beckmann, J., Nqweniso, S., Ludyga, S., du Randt, R., Gresse, A., Long, K. Z., Nienaber, M., Seelig, H., Pühse, U., Steinmann, P., Utzinger, J., Walter, C., Gerber, M., & Lang, C. (2022). Evaluation of a Physical Activity and Multi-Micronutrient Intervention on Cognitive and Academic Performance in South African Primary Schoolchildren. *Nutrients*, *14*(13). <https://doi.org/10.3390/nu14132609>
- Bugge, A., Möller, S., Tarp, J., Hillman, C., Lima, R., Gejl, A., Klakk, A., & Wedderkopp, N. (2018). Influence of a 2- to 6-year physical education intervention on scholastic performance: The CHAMPS study-DK. *Scand J Med Sci Sports*, *28*(1), 228–236. <https://doi.org/10.1111/sms.12902>



- Bunketorp, K. L., Malmgren H, Olsson E, Lindén T, & Nilsson M. (2015). Effects of a Curricular Physical Activity Intervention on Children's School Performance, Wellness, and Brain Development. *J Sch Health*, 85(10), 704–713. <https://doi.org/10.1111/josh.12303>
- Cecchini, J. A., & Carriedo, A. (2020). Effects of an Interdisciplinary Approach Integrating Mathematics and Physical Education on Mathematical Learning and Physical Activity Levels. *JOURNAL OF TEACHING IN PHYSICAL EDUCATION*, 39(1), 121–125. <https://doi.org/10.1123/jtpe.2018-0274>
- Chaddock-Heyman, L., Erickson, K. I., Voss, M. W., Knecht, A. M., Pontifex, M. B., Castelli, D. M., Hillman, C. H., & Kramer, A. F. (2013). The effects of physical activity on functional MRI activation associated with cognitive control in children: A randomized controlled intervention. *Frontiers in Human Neuroscience*, 7, 72–72. <https://doi.org/10.3389/fnhum.2013.00072>
- Chaddock-Heyman, L., Weng, T. B., Kienzler, C., Weisshappel, R., Drollette, E. S., Raine, L. B., Westfall, D. R., Kao, S.-C., Baniqued, P., Castelli, D. M., Hillman, C. H., & Kramer, A. F. (2020). Brain network modularity predicts improvements in cognitive and scholastic performance in children involved in a physical activity intervention. *Frontiers in Human Neuroscience*, 14. <https://doi.org/10.3389/fnhum.2020.00346>
- Chaya, M. S., Nagendra, H., Selvam, S., Kurpad, A., & Srinivasan, K. (2012). Effect of yoga on cognitive abilities in schoolchildren from a socioeconomically disadvantaged background: A randomized controlled study. *J Altern Complement Med*, 18(12), 1161–1167. <https://doi.org/10.1089/acm.2011.0579>
- Cichy, I., Kaczmarczyk, M., Wawrzyniak, S., Kruszwicka, A., Przybyla, T., Klichowski, M., & Rokita, A. (2020). Participating in Physical Classes Using Eduball Stimulates Acquisition of Mathematical Knowledge and Skills by Primary School Students. *FRONTIERS IN PSYCHOLOGY*, 11. <https://doi.org/10.3389/fpsyg.2020.02194>
- Coe, D., Pivarnik JM, Womack CJ, Reeves MJ, & Malina RM. (2006). Effect of physical education and activity levels on academic achievement in children. *Med Sci Sports Exerc*, 38(8), 1515–1519. <https://doi.org/10.1249/01.mss.0000227537.13175.1b>

- Condello, G., Mazzoli, E., Masci, I., De Fano, A., Ben-Soussan, T. D., Marchetti, R., & Pesce, C. (2021). Fostering Holistic Development with a Designed Multisport Intervention in Physical Education: A Class-Randomized Cross-Over Trial. *International Journal of Environmental Research and Public Health*, 18(18), 9871. <https://doi.org/10.3390/ijerph18189871>
- Crova, C., Struzzolino I, Marchetti R, Masci I, Vannozzi G, Forte R, & Pesce C. (2014). Cognitively challenging physical activity benefits executive function in overweight children. *J Sports Sci*, 32(3), 201–211. <https://doi.org/10.1080/02640414.2013.828849>
- Dalziell, A., Booth, J. N., Boyle, J., & Mutrie, N. (2019). Better Movers and Thinkers: An evaluation of how a novel approach to teaching physical education can impact children’s physical activity, coordination and cognition. *BRITISH EDUCATIONAL RESEARCH JOURNAL*, 45(3), 576–591. <https://doi.org/10.1002/berj.3514>
- Dalziell, A., Boyle, J., & Mutrie, N. (2015). Better Movers and Thinkers (BMT): An Exploratory Study of an Innovative Approach to Physical Education. *EJOP*, 11(4), 722–741. <https://doi.org/10.5964/ejop.v11i4.950>
- DeBruijn, A., Kostons DDNM, Van Der Fels IMJ, Visscher C, Oosterlaan J, Hartman E, & Bosker RJ. (2020). Effects of aerobic and cognitively-engaging physical activity on academic skills: A cluster randomized controlled trial. *J Sports Sci*, 38(15), 1806–1817. <https://doi.org/10.1080/02640414.2020.1756680>
- DeGreeff, A., Hartman E, Mullender-Wijnsma MJ, Bosker RJ, Doolaard S, & Visscher C. (2016). Long-term effects of physically active academic lessons on physical fitness and executive functions in primary school children. *Health Educ Res*, 31(2), 185–194. <https://doi.org/10.1093/her/cyv102>
- Donnelly, A., Hillman CH, Greene JL, Hansen DM, Gibson CA, Sullivan DK, Poggio J, Mayo MS, Lambourne K, Szabo-Reed AN, Herrmann SD, Honas JJ, Scudder MR, Betts JL, Henley K, Hunt SL, & Washburn RA. (2017). Physical activity and academic achievement across the curriculum: Results from a 3-year cluster-randomized trial. *Prev Med*, 99, 140–145. <https://doi.org/10.1016/j.ypmed.2017.02.006>
- D’Souza, A. A., & Wiseheart, M. (2018). Cognitive effects of music and dance training in children. *Archives of Scientific Psychology*, 6(1), 178–192. <https://doi.org/10.1037/arc0000048>

- Egger, F., Benzing V, Conzelmann A, & Schmidt M. (2019). Boost your brain, while having a break! The effects of long-term cognitively engaging physical activity breaks on children's executive functions and academic achievement. *PLoS One*, *14*(3), e0212482. <https://doi.org/10.1371/journal.pone.0212482>
- Fedewa, A., Fettrow E, Erwin H, Ahn S, & Farook M. (2018). Academic-Based and Aerobic-Only Movement Breaks: Are There Differential Effects on Physical Activity and Achievement? *Res Q Exerc Sport*, *89*(2), 153–163. <https://doi.org/10.1080/02701367.2018.1431602>
- Fedewa, A. L., Ahn, S., Erwin, H., & Davis, M. C. (2015). A randomized controlled design investigating the effects of classroom-based physical activity on children's fluid intelligence and achievement. *School Psychology International*, *36*(2), 135–153. <https://doi.org/10.1177/0143034314565424>
- Fernandes, G. N. A., & Lemos, S. M. A. (2022). Quality of life and self-perceived health of adolescents in Middle School. *CoDAS*, *34*(6), e20210046. <https://doi.org/10.1590/2317-1782/20212021046>
- Fisher, A., Boyle JM, Paton JY, Tomporowski P, Watson C, McColl JH, & Reilly JJ. (2011). Effects of a physical education intervention on cognitive function in young children: Randomized controlled pilot study. *BMC Pediatr*, *11*, 97. <https://doi.org/10.1186/1471-2431-11-97>
- Frischen, U., Schwarzer, G., & Degé, F. (2019). Comparing the effects of rhythm-based music training and pitch-based music training on executive functions in preschoolers. *Frontiers in Integrative Neuroscience*, *13*. <https://doi.org/10.3389/fnint.2019.00041>
- Gall, S., Adams L, Joubert N, Ludyga S, Müller I, Nqweniso S, Pühse U, du Randt R, Seelig H, Smith D, Steinmann P, Utzinger J, Walter C, & Gerber M. (2018). Effect of a 20-week physical activity intervention on selective attention and academic performance in children living in disadvantaged neighborhoods: A cluster randomized control trial. *PLoS One*, *13*(11), e0206908. <https://doi.org/10.1371/journal.pone.0206908>
- Gallotta, M., Emerenziani, G. P., Iazzoni, S., & Guidetti, L. (2015). Impacts of coordinative training on normal weight and overweight/obese children's attentional performance. *Frontiers in Human Neuroscience*. <https://doi.org/10.3389/fnhum.2015.00577>

- García-Hermoso, A., Hormazábal-Aguayo I, Fernández-Vergara O, González-Calderón N, Russell-Guzmán J, Vicencio-Rojas F, Chacana-Cañas C, & Ramírez-Vélez R. (2020). A before-school physical activity intervention to improve cognitive parameters in children: The Active-Start study. *Scand J Med Sci Sports*, 30(1), 108–116. <https://doi.org/10.1111/sms.13537>
- Giordano, G., & Alesi, M. (2022). Does Physical Activity Improve Inhibition in Kindergarteners? A Pilot Study. *Perceptual and Motor Skills*, 129(4), 1001–1013. <https://doi.org/10.1177/00315125221109216>
- Have, M., Nielsen JH, Ernst MT, Gejl AK, Fredens K, Grøntved A, & Kristensen PL. (2018). Classroom-based physical activity improves children’s math achievement—A randomized controlled trial. *PLoS One*, 13(12), e0208787. <https://doi.org/10.1371/journal.pone.0208787>
- Hillman, C. H., Pontifex, M. B., Castelli, D. M., Khan, N. A., Raine, L. B., Scudder, M. R., Drollette, E. S., Moore, R. D., Wu, C.-T., & Kamijo, K. (2014). Effects of the FITKids Randomized Controlled Trial on Executive Control and Brain Function. *PEDIATRICS*, 134(4), e1063–e1071. <https://doi.org/10.1542/peds.2013-3219>
- Hraste, M., De Giorgio A, Jelaska PM, Padulo J, & Granić I. (2018). When mathematics meets physical activity in the school-aged child: The effect of an integrated motor and cognitive approach to learning geometry. *PLoS One*, 13(8), e0196024. <https://doi.org/10.1371/journal.pone.0196024>
- Hsieh, S., Lin CC, Chang YK, Huang CJ, & Hung TM. (2017). Effects of Childhood Gymnastics Program on Spatial Working Memory. *Med Sci Sports Exerc*, 49(12), 2537–2547. <https://doi.org/10.1249/MSS.0000000000001399>
- Jia, N., Zhang, X., Wang, X., Dong, X., Zhou, Y., & Ding, M. (2021). The Effects of Diverse Exercise on Cognition and Mental Health of Children Aged 5-6 Years: A Controlled Trial. *Frontiers in Psychology*, 12, 759351. <https://doi.org/10.3389/fpsyg.2021.759351>
- Kamijo, K., Pontifex, M. B., O’Leary, K. C., Scudder, M. R., Wu, C.-T., Castelli, D. M., & Hillman, C. H. (2011). The effects of an afterschool physical activity program on working memory in preadolescent children. *Dev Sci*, 14(5), 1046–1058. <https://doi.org/10.1111/j.1467-7687.2011.01054.x>

- Koutsandreu, F., Wegner, M., Niemann, C., & Budde, H. (2015). Effects of motor vs. Cardiovascular exercise training on children's working memory. *Medicine and Science in Sports and Exercise*.  
[https://www.researchgate.net/publication/288629976\\_Effects\\_of\\_motor\\_vs\\_cardiovascular\\_exercise\\_training\\_on\\_children's\\_working\\_memory](https://www.researchgate.net/publication/288629976_Effects_of_motor_vs_cardiovascular_exercise_training_on_children's_working_memory)
- Kvalo, S., Edvin, B., Dyrstad, S. M., & Bonnicksen, K. (2017). Does Increased Physical Activity in School Affect Children's Executive function and Aerobic Fitness? *Scandinavian Journal of Medicine and Science in Sports*, 27(12).  
[https://www.researchgate.net/publication/313817249\\_Does\\_Increased\\_Physical\\_Activity\\_in\\_School\\_Affect\\_Children's\\_Executive\\_function\\_and\\_Aerobic\\_Fitness](https://www.researchgate.net/publication/313817249_Does_Increased_Physical_Activity_in_School_Affect_Children's_Executive_function_and_Aerobic_Fitness)
- Lakes, K. D., Bryars, T., Sirisinahal, S., Salim, N., Arastoo, S., Emmerson, N., Kang, D., Shim, L., Wong, D., & Kang, C. J. (2013). The Healthy for Life Taekwondo pilot study: A preliminary evaluation of effects on executive function and BMI, feasibility, and acceptability. *Mental Health and Physical Activity*, 6(3), 181–188. <https://doi.org/10.1016/j.mhpa.2013.07.002>
- Lakes, K. D., & Hoyt, W. T. (2004). Promoting self-regulation through school-based martial arts training. *Journal of Applied Developmental Psychology*, 25(3), 283–302. <https://doi.org/10.1016/j.appdev.2004.04.002>
- Leandro, C. R., Monteiro, E., & Melo, F. (2018). Interdisciplinary working practices: Can creative dance improve math? *RESEARCH IN DANCE EDUCATION*, 19(1), 74–90. <https://doi.org/10.1080/14647893.2017.1354838>
- Lin, J., Zhang, R., Shen, J., & Zhou, A. (2022). Effects of school-based neuromuscular training on fundamental movement skills and physical fitness in children: A systematic review. *PeerJ*, 10, e13726.  
<https://doi.org/10.7717/peerj.13726>
- Lind, R., Geertsen SS, Ørntoft C, Madsen M, Larsen MN, Dvorak J, Ritz C, & Krstrup P. (2018). Improved cognitive performance in preadolescent Danish children after the school-based physical activity programme 'FIFA 11 for Health' for Europe—A cluster-randomised controlled trial. *Eur J Sport Sci*, 18(1), 130–139.  
<https://doi.org/10.1080/17461391.2017.1394369>

- Marson, F., Fano, A. D., Pellegrino, M., Pesce, C., Glicksohn, J., & Ben-Soussan, T. D. (2021). Age-Related Differential Effects of School-Based Sitting and Movement Meditation on Creativity and Spatial Cognition: A Pilot Study. *Children*, 8(7), 583. <https://doi.org/10.3390/children8070583>
- Mavilidi, M. F., Lubans, D. R., Eather, N., Morgan, P. J., & Riley, N. (2018). Preliminary Efficacy and Feasibility of “Thinking While Moving in English”: A Program with Physical Activity Integrated into Primary School English Lessons. *CHILDREN-BASEL*, 5(8). <https://doi.org/10.3390/children5080109>
- Mavilidi, M. F., Lubans, D. R., Miller, A., Eather, N., Morgan, P. J., Lonsdale, C., Noetel, M., Karayanidis, F., Shaw, K., & Riley, N. (2020). Impact of the ‘Thinking while Moving in English’ intervention on primary school children’s academic outcomes and physical activity: A cluster randomised controlled trial. *International Journal of Educational Research*, 102, N.PAG-N.PAG.
- Mavilidi, M. F., & Vazou, S. (2021). Classroom-based physical activity and math performance: Integrated physical activity or not? *Acta Paediatrica (Oslo, Norway : 1992)*, 110(7), 2149–2156. <https://doi.org/10.1111/apa.15860>
- Mazzoli, E., Salmon, J., Pesce, C., Teo, W.-P., Rinehart, N., May, T., & Barnett, L. M. (2021). Effects of classroom-based active breaks on cognition, sitting and on-task behaviour in children with intellectual disability: A pilot study. *Journal of Intellectual Disability Research : JIDR*, 65(5), 464–488. <https://doi.org/10.1111/jir.12826>
- McMahon, S. D., Rose, D. S., & Parks, M. (2003). Basic Reading Through Dance Program: The Impact on First-Grade Students’ Basic Reading Skills. *Eval Rev*, 27(1), 104–125. <https://doi.org/10.1177/0193841X02239021>
- Mead, T., Scibora, L., Gardner, J., & Dunn, S. (2016). The Impact of Stability Balls, Activity Breaks, and a Sedentary Classroom on Standardized Math Scores. *The Physical Educator*, 73(3), 433–449. <https://doi.org/10.18666/TPE-2016-V73-I3-5303>
- Meijer, A., Königs, M., van der Fels, I. M. J., Visscher, C., Bosker, R. J., Hartman, E., & Oosterlaan, J. (2021). The Effects of Aerobic Versus Cognitively Demanding Exercise Interventions on Executive Functioning in

- School-Aged Children: A Cluster-Randomized Controlled Trial. *Journal of Sport & Exercise Psychology*, 43(1), 1–13. <https://doi.org/10.1123/jsep.2020-0034>
- Meloni, C., & Fanari, R. (2019). Chess Training Effect on Meta-Cognitive Processes and Academic Performance. *International Association for Development of the Information Society*.  
<https://ezp.lib.cam.ac.uk/login?url=https://search.ebscohost.com/login.aspx?direct=true&db=eric&AN=ED608753&site=ehost-live&scope=site>
- Moreau, D., Kirk IJ, & Waldie KE. (2017). High-intensity training enhances executive function in children in a randomized, placebo-controlled trial. *Elife*, 6. <https://doi.org/10.7554/eLife.25062>
- Morris, J. L., Archbold, V. S. J., Bond, S. J., & Daly-Smith, A. (2022). Effects of Maths on the Move on Children’s Perspectives, Physical Activity, and Math Performance. *Translational Journal of the American College of Sports Medicine*, 7(1). <https://doi.org/10.1249/TJX.000000000000191>
- Mullender-Wijnsma, M., Hartman E, de Greeff JW, Bosker RJ, Doolaard S, & Visscher C. (2015). Improving academic performance of school-age children by physical activity in the classroom: 1-year program evaluation. *J Sch Health*, 85(6), 365–371. <https://doi.org/10.1111/josh.12259>
- Mullender-Wijnsma, M., Hartman E, de Greeff JW, Doolaard S, Bosker RJ, & Visscher C. (2016). Physically Active Math and Language Lessons Improve Academic Achievement: A Cluster Randomized Controlled Trial. *Pediatrics*, 137(3), e20152743. <https://doi.org/10.1542/peds.2015-2743>
- Mullender-Wijnsma, M. J., Hartman, E., de Greeff, J. W., Doolaard, S., Bosker, R. J., & Visscher, C. (2019). Follow-Up Study Investigating the Effects of a Physically Active Academic Intervention. *Early Childhood Education Journal*, 47(6), 699–707.
- Neville, R. D., & Makopoulou, K. (2020). Effect of a six-week dance-based physical education intervention on primary school children’s creativity: A pilot study. *European Physical Education Review*, 1356336X2093958. <https://doi.org/10.1177/1356336X20939586>
- Nobre, G. C., Nobre, F. S. S., & Valentini, N. C. (2022). Effectiveness of a Mastery Climate Cognitive-Motor Skills School-based Intervention in children living in poverty: Motor and Academic performance, self-



perceptions, and BMI. *Physical Education and Sport Pedagogy*, 1–17.

<https://doi.org/10.1080/17408989.2022.2054972>

Norris, E., Dunsmuir S, Duke-Williams O, Stamatakis E, & Shelton N. (2018). Physically Active Lessons Improve Lesson Activity and On-Task Behavior: A Cluster-Randomized Controlled Trial of the ‘Virtual Traveller’ Intervention. *Health Educ Behav*, 45(6), 945–956. <https://doi.org/10.1177/1090198118762106>

Oppici, L., Rudd, J. R., Buszard, T., & Spittle, S. (2020). Efficacy of a 7-week dance (RCT) PE curriculum with different teaching pedagogies and levels of cognitive challenge to improve working memory capacity and motor competence in 8–10 years old children. *Psychology of Sport and Exercise*, 50, 101675.

<https://doi.org/10.1016/j.psychsport.2020.101675>

Pesce, C., Crova, C., Marchetti, R., Struzzolino, I., Masci, I., Vannozzi, G., & Forte, R. (2013). Searching for cognitively optimal challenge point in physical activity for children with typical and atypical motor development. *Mental Health and Physical Activity*, 6(3), 172–180.

<https://doi.org/10.1016/j.mhpa.2013.07.001>

Pesce, C., Lakes, K. D., Stodden, D. F., & Marchetti, R. (2021). Fostering Self-Control Development With a Designed Intervention in Physical Education: A Two-Year Class-Randomized Trial. *Child Development*, 92(3), 937–958. <https://doi.org/10.1111/cdev.13445>

Pesce, C., Masci, I., Marchetti, R., Vazou, S., Sääkslahti, A., & Tomporowski, P. D. (2016). Deliberate play and preparation jointly benefit motor and cognitive development: Mediated and moderated effects. *Frontiers in Psychology*, 7. <https://doi.org/10.3389/fpsyg.2016.00349>

Reed, J., Einstein G, Hahn E, Hooker SP, Gross VP, & Kravitz J. (2010). Examining the impact of integrating physical activity on fluid intelligence and academic performance in an elementary school setting: A preliminary investigation. *J Phys Act Health*, 7(3), 343–351. <https://doi.org/10.1123/jpah.7.3.343>

Resaland, G., Aadland E, Moe VF, Aadland KN, Skrede T, Stavnsbo M, Suominen L, Steene-Johannessen J, Glosvik Ø, Andersen JR, Kvalheim OM, Engelsrud G, Andersen LB, Holme IM, Ommundsen Y, Kriemler S, van Mechelen W, McKay HA, Ekelund U, & Anderssen SA. (2016). Effects of physical activity on



- schoolchildren's academic performance: The Active Smarter Kids (ASK) cluster-randomized controlled trial. *Prev Med*, 91, 322–328. <https://doi.org/10.1016/j.ypmed.2016.09.005>
- Richard, V., Lebeau, J.-C., Becker, F., Boiangin, N., & Tenenbaum, G. (2018). Developing cognitive and motor creativity in children through an exercise program using nonlinear pedagogy principles. *Creativity Research Journal*, 30(4), 391–401.
- Riley, N., Lubans, D. R., Holmes, K., & Morgan, P. J. (2016). Findings From the EASY Minds Cluster Randomized Controlled Trial: Evaluation of a Physical Activity Integration Program for Mathematics in Primary Schools. *Journal of Physical Activity & Health*, 13(2), 198–206. <https://doi.org/10.1123/jpah.2015-0046>
- Riley N, Lubans DR, Morgan PJ, & Young M. (2015). Outcomes and process evaluation of a programme integrating physical activity into the primary school mathematics curriculum: The EASY Minds pilot randomised controlled trial. *J Sci Med Sport*, 18(6), 656–661. <https://doi.org/10.1016/j.jsams.2014.09.005>
- Rudd, J., Buszard, T., Spittle, S., O'Callaghan, L., & Oppici, L. (2021). Comparing the efficacy (RCT) of learning a dance choreography and practicing creative dance on improving executive functions and motor competence in 6–7 years old children. *Psychology of Sport and Exercise*, 53, 101846. <https://doi.org/10.1016/j.psychsport.2020.101846>
- Sánchez-López, M., Cavero-Redondo I, Álvarez-Bueno C, Ruiz-Hermosa A, Pozuelo-Carrascosa DP, Díez-Fernández A, Gutierrez-Díaz Del Campo D, Pardo-Guijarro MJ, & Martínez-Vizcaíno V. (2019). Impact of a multicomponent physical activity intervention on cognitive performance: The MOVI-KIDS study. *Scand J Med Sci Sports*, 29(5), 766–775. <https://doi.org/10.1111/sms.13383>
- Santos, S., Jiménez S, Sampaio J, & Leite N. (2017). Effects of the Skills4Genius sports-based training program in creative behavior. *PLoS One*, 12(2), e0172520. <https://doi.org/10.1371/journal.pone.0172520>
- Schmidt, S., Jäger K, Egger F, Roebers CM, & Conzelmann A. (2015). Cognitively Engaging Chronic Physical Activity, But Not Aerobic Exercise, Affects Executive Functions in Primary School Children: A Group-Randomized Controlled Trial. *J Sport Exerc Psychol*, 37(6), 575–591. <https://doi.org/10.1123/jsep.2015-0069>

- Sjöwall, D., Hertz, M., & Klingberg, T. (2017). No long-term effect of physical activity intervention on working memory or arithmetic in preadolescents. *Frontiers in Psychology, 8*.  
<https://doi.org/10.3389/fpsyg.2017.01342>
- Tanir, A., & Erkut, O. (2018). Effect of Rhythmic Basketball Lessons on Visual Attention Ability and Lay-Up Skill in School Children Aged 9-10. *Universal Journal of Educational Research, 6*(9), 1857–1862.
- Telford, R. D., Cunningham, R. B., Fitzgerald, R., Olive, L. S., Prosser, L., Xiaoli Jiang, & Telford, R. M. (2012). Physical Education, Obesity, and Academic Achievement: A 2-Year Longitudinal Investigation of Australian Elementary School Children. *American Journal of Public Health (1971), 102*(2), 368–374.  
<https://doi.org/10.2105/AJPH.2011.300220>
- Telles, S., Singh, N., Bhardwaj, A. K., Kumar, A., & Balkrishna, A. (2013). Effect of yoga or physical exercise on physical, cognitive and emotional measures in children: A randomized controlled trial. *Child and Adolescent Psychiatry and Mental Health, 7*. <https://doi.org/10.1186/1753-2000-7-37>
- Tocci, N., Scibinetti, P., Mazzoli, E., Mavilidi, M. F., Masci, I., Schmidt, M., & Pesce, C. (2022). Giving Ideas Some Legs or Legs Some Ideas? Children’s Motor Creativity Is Enhanced by Physical Activity Enrichment: Direct and Mediated Paths. *Frontiers in Psychology, 13*, 806065. <https://doi.org/10.3389/fpsyg.2022.806065>
- Tottori, N., Morita N, Ueta K, & Fujita S. (2019). Effects of High Intensity Interval Training on Executive Function in Children Aged 8-12 Years. *Int J Environ Res Public Health, 16*(21).  
<https://doi.org/10.3390/ijerph16214127>
- Tseng, W.-Y., Rekik, G., Chen, C.-H., Clemente, F. M., Bezerra, P., Crowley-McHattan, Z. J., & Chen, Y.-S. (2021). Effects of 8-Week FIFA 11+ for Kids Intervention on Physical Fitness and Attention in Elementary School Children. *Journal of Physical Activity & Health, 18*(6), 686–693. <https://doi.org/10.1123/jpah.2020-0823>
- Van de Niet, A., Smith J, Oosterlaan J, Scherder EJ, Hartman E, & Visscher C. (2016). Effects of a Cognitively Demanding Aerobic Intervention During Recess on Children’s Physical Fitness and Executive Functioning. *Pediatr Exerc Sci, 28*(1), 64–70. <https://doi.org/10.1123/pes.2015-0084>

- Van den Berg, V., Saliassi, E., de Groot, R. H. M., Chinapaw, M. J. M., & Singh, A. S. (2019). Improving cognitive performance of 9–12 years old children: Just dance? A randomized controlled trial. *Frontiers in Psychology, 10*. <https://doi.org/10.3389/fpsyg.2019.00174>
- Van den Berg, V., Singh AS, Komen A, Hazelebach C, van Hilvoorde I, & Chinapaw MJM. (2019). Integrating Juggling with Math Lessons: A Randomized Controlled Trial Assessing Effects of Physically Active Learning on Maths Performance and Enjoyment in Primary School Children. *Int J Environ Res Public Health, 16*(14). <https://doi.org/10.3390/ijerph16142452>
- Van Klaveren, C., & De Witte, K. (2015). Football to Improve Math and Reading Performance. *Education Economics, 23*(5), 577–595.
- Vazou, S., & Skrade, M. A. (2017). Intervention integrating physical activity with math: Math performance, perceived competence, and need satisfaction. *International Journal of Sport and Exercise Psychology, 15*(5), 508–522. <https://doi.org/10.1080/1612197X.2016.1164226>
- Vetter, O'Connor HT, O'Dwyer N, Chau J, & Orr R. (2020). 'Maths on the move': Effectiveness of physically-active lessons for learning maths and increasing physical activity in primary school students. *J Sci Med Sport, 23*(8), 735–739. <https://doi.org/10.1016/j.jsams.2019.12.019>
- Watson, Timperio A, Brown H, & Hesketh KD. (2019). A pilot primary school active break program (ACTI-BREAK): Effects on academic and physical activity outcomes for students in Years 3 and 4. *J Sci Med Sport, 22*(4), 438–443. <https://doi.org/10.1016/j.jsams.2018.09.232>
- Zinelabidine, K., Elghoul, Y., Jouira, G., & Sahli, S. (2022). The Effect of an 8-Week Aerobic Dance Program on Executive Function in Children. *Perceptual and Motor Skills, 129*(1), 153–175. <https://doi.org/10.1177/00315125211058001>
